# Supplementary material for: Validity and limitations of simple reaction kinetics to calculateconcentrations of organic compounds from ion counts in PTR-MS
Source: Copernicus journal article supplement (doi:10.5194/amt-2018-446), 2019-01-21
Supplement: Supplementary file [file amt-2018-446-AC2-supplement.pdf]

**Final Author's response to reviewer comments on "Validity and limitations of simple reaction kinetics to calculate concentrations of organic compounds from ion counts in PTR-MS" by Rupert Holzinger et al.**

We thank referee #3 for their insightful and high-quality comments on our manuscript. In the following we address their comments point by point. The referee comments are copied to this document in *blue* font.

**Report #2(referee #3):**

*Major comments:*

*The purpose of the paper is a little unclear. Is it to evaluate the agreement between different PTR instruments or evaluate long-term stability? The title suggests it is to evaluate a method of determining sensitivity for uncalibrated compounds. If so, effect of fragmentation and wall-interactions should be considered.*

As the title clearly states the purpose of this work, which is testing the validity of simple reaction kinetics to calculate VOC concentrations for a larger suite of PTR-MS instruments, all operated under field conditions. A method to constrain the transmission of the mass analyzer is a fundamental requirement to analyze the validity of the kinetic model and therefore this is a central part of the presented work.

Wall interactions and fragmentation are issues that certainly deserve careful attention, but these issues were not the focus of the present work. We want to refer to the EUROCHAMP PTR-MS Intercomparison Campaign that took place in May 2019 at the HELIOS chamber in France that was designed to address questions associated with wall interactions, humidity, fragmentation, and the detection of uncalibrated oxidation products.

*The linear relationship between proton-transfer rate constant and sensitivity for select group of simple compounds has been reported since some time. This aspect is not particularly novel and does not require so much discussion.*

It is true that the relationship has been reported, but at the same time the limitations of kinetic approach have been highlighted, and the reliability of uncalibrated PTR-MS measurements has been questioned. This is the first study that tested the kinetic approach on many different PTR-MS instruments operated under common field conditions. We think that this is an important work that will encourage the PTR-MS community to explore the scientific wealth of untargeted (thus uncalibrated) measurements.

*The consideration of mass-dependent transmission is interesting and important for a robust calculation of sensitivity but is weakened by the very small number of compounds used to derive the curve. The degree of uncertainty in the derived transmission curve is not quantified. It would be of interest to describe how much the transmission curves vary between instruments, whether the curves can be wholly explained by known effects with ion optics, tof duty cycle, etc; and how much we can expect the transmission curve to vary in a single instrument given different instrument settings and typical campaign variability.*

We do not agree with the notion that the transmission is retrieved by a very small number of compounds. Actually, there are no big gaps between 33 and 137 Th, above that there were less compounds but the coverage until 371 Th is unique! We agree that more compounds are desirable especially above 200 Th. In our manuscript we discuss that due to this deficiency the transmission is less well constrained above 200 Th, which can be seen for example in the bottom, middle chart of Figure 3.

The expected behavior of the transmission curve is described in section 2.2.1. For example, the general characteristic of a TOF-MS (the square root relationship) is preserved in the medium mass

range. At lower masses the ion intensities are reduced by ion optics between reactor and mass analyzer. The optics act as a high-masses-pass filter because focusing techniques are more efficient for heavier ions. In some instruments the effect is intentionally enhanced to reduce the primary ion intensities and detector ageing. Detector ageing or insufficient TOF-MS tuning often acts as low-masses-pass filter in the high mass range. In answering the reviewer's question we conclude that we have fair knowledge to explain the behavior of the transmission curve.

Long term stability of the transmission curve depends on stable operating condition and on minimizing/correcting detector ageing. These conditions were met for 2 instruments (TOF8000 UHEL, and QMSLSCE, see section 3.1 and Figure 3).

*The introduction is missing references to several highly relevant papers including methods to relate reaction kinetics to concentrations (Sekimoto et al. IJMS 2018; Cappellin et al. EST 2012, etc), a reference to the source of the kinetic rate constants In Table S3, and recent reviews that include assessments of PTR-MS precision and accuracy (e.g. Yuan et al. Chem. Rev. 2017). Additionally the introduction needs some more background about mass-dependent transmission, why it is important to consider, and previous methods used to determine the transmission curve in CIMS instrumentation. Relatedly there should be some information about the different hardware components of the system and how they're expected to affect transmission in different masses ranges; this is necessary to introduce Section 2.2.1.*

We extended the discussion and added the requested references. Following text has been added to the introduction at line 15 on page 2:

*"For example, Cappellin et al. (2012) demonstrated the quantitative properties of a PTR-TOF8000 instrument by assuming a theoretical transmission based on the duty-cycle in the time-of-flight mass analyser. However, new generation instruments substantially gained sensitivity by using advanced ion optics between reactor and mass analyser at the cost that the transmission of the whole system is less well constrained – especially in the lower mass range. In addition, poor tuning and/or ageing of the ion detection system can cause deviations from the expected behaviour at the high mass range. So, fast and robust methods for retrieving the transmission are needed for quantitative measurements. Another requirement is the knowledge of the reaction rate constant for proton transfer between protonated water and the compound to be quantified. Proton transfer reactions typically occur at collisional rates, which can be calculated using quantum chemical methods (e.g. Su, 1994; Zhao and Zhang, 2004). Sekimoto et al. (2017) developed a method to estimate the reaction rate constant from the molecular composition rather than from molecular polarizability and dipole moment. Such attempts are promising and may further increase the stand-alone quantitative capacity of PTR-MS by exploiting parameters that are directly measured (i.e. the molecular composition of the ion to be quantified)."*

*Section 2: Can you please provide an overview of the instruments and the relevant differences among them?*

This information is provided in Table 1, which is already referenced in the introduction (page 3, line 5).

*Page 3 section 2.1 Here are missing some details about how the calibration system operates. Are the calibration compounds injected into the sample loop as pure gases, or is a pre-diluted sample of a standard cylinder collected in the sample loop and later released into a secondary dilution stream? What is the advantage of using this system compared to diluting a constant stream of calgas with known flow into a dilution stream (dynamic dilution)? What is the material of the calibration system? Were wall-loss effects considered?*

On page 3, lines 24-29, provide detailed information about the gas standard cylinders we used, so 'a pre-diluted sample of a standard cylinder' is used. We will provide this information earlier in the section (see below). We added the missing information concerning materials, wall loss, and the advantages of using the sample loop approach (see below).

In the second sentence of section 2.1 we added the information in **bold** letters:

*"A small flow (~10 mL/min) of carrier gas transports the content of the sample loop (**i.e. a multi-component gas standard containing approximately 1  $\mu\text{mol/mol}$  per compound in  $\text{N}_2$** ) to a T-connection where it is mixed into a larger flow (0.2-2 L/min) of dry or humidified carrier gas."*

We added following sentences to section 2.1:

*"In order to avoid wall loss, the sample loop, 6-port valve, and dilution system are operated at approximately 80°C, and all materials in contact with the gas standard are either stainless steel with sulfiner<sup>®</sup> coating (Restek Inc.), or Teflon PFA. The sample loop approach allows to perform full calibrations very quickly (within 1-2 seconds). Multiple calibrations in a row are feasible to assess the quality of the calibrations directly and/or to explore different operating conditions (e.g. humidified or dry gas, E/N settings etc.)."*

*Page 3 line 25: Was a comparison of the two successive calibration cylinders conducted, to ensure consistency?*

This was mainly for practical reasons: in the beginning of the campaign the NPL standard was not yet available. On the other hand, the A&R standard contained 2 more compounds in the high mass range.

*Page 3 line 28: Is there any information on long-term stability of siloxanes in cylinders? Monoterpenes are known to be not especially stable long-term. When were the cylinders produced?*

The A&R was produced in 2016 and the NPL standard just before the campaign. The stability of the compounds in the NPL standard has been re-confirmed by NPL after the campaign. Comparing the 2 standards we see no indication that the siloxanes were unstable in the A&R cylinder.

*Fig. 2: The many subfigures and small text make this figure difficult to read and grasp the main point. Why is dry nitrogen included twice?*

As explained in section 2.1 (and in the Figure caption) the protocol started AND ended with a set of 10 dry  $\text{N}_2$  injections.

*Eq. 1: what is  $f(M)$ - the detected signal? In cps or ncps? For the time-of-flight instruments, is it corrected for the duty-cycle of the ToF extraction region? When adding together the sensitivities of fragmenting compounds, which mass is used for  $M$ : the parent mass, the fragment, or an average?*

$f_1(M)$  is the first of the 3 functions that approximate the transmission and it is a function of  $m/Q$ . The 'TOF duty-cycle' is the reason why we expect a square root relationship, i.e. the parameter  $a$  in Eq. 1 is expected to be around 0.5. We used the parent mass for adding the sensitivities. We are aware that this procedure underestimates the sensitivity of isoprene if there was no fragmentation, however, typically less than 20% if isoprene fragmented and therefore this limitation did not affect the retrieval algorithm significantly. To clarify this we changed the last sentence of this paragraph to:

*"For fragmenting compounds (e. g. isoprene) we added the measured sensitivity of the fragment to the sensitivity of the protonated ion (used in the algorithm)."*

*Were the forms of equations 1,2, 3 determined empirically or are these based on some knowledge of relevant ion physics?*

As explained above the forms were chosen to describe the general behavior of a TOF mass analyzer (Eq.1), the characteristics of the ion optics in the transfer region between reactor and TOF (Eq.2), and potential issues with tuning/ageing of the ion detection system (Eq. 3).

*Page 6 line 4. It would be helpful to have a figure in the main text showing an example optimized fit of Eq1, Eq2, Eq3 to the six compounds, as well as the final retrieved transmission from Eq4 compared to real data (e.g. Figure S2 as a publication-quality graphic).*

First we want to point out that the all compounds in the standard are used to retrieve the transmission (more than six!). We were considering this a lot, but eventually decided to show the overview of all transmissions and all instruments in the main publication (Figure 3) because this is of general interest. Figures S2 and S3 provide more detailed technical information on the performance of the algorithm and we feel that the supplement is an appropriate location.

*Page 7: Is the effect of the much higher temperature in the drift tube (compared to ambient) on the kinetic rate constants considered?*

Yes.

*Page 7 line 17: Not clear if normalizing factor "N" includes correction for transmission; says so in page 6 line 22 but not here?*

Yes. As stated  $S_N$  uses the factor "N",  $S_m$  does not.

*Page 8 line 19: what is meant by "steeper" transmission?*

Steeper means a larger parameter 'a' (Eq.1). We clarified steeper and flatter in this paragraph by adding (larger parameter 'a' in Eq.1) and (smaller parameter 'a' in Eq.1), respectively.

*Page 11 line 12: isn't this in contradiction to earlier statement about PTR3; the high sensitivity is due to long reaction time?*

Yes, PTR3 is different and the statement does not refer to PTR3. The discussion on page 11, line 12, is about features in Figure 6, which does not show PTR3 data.

*Page 13 bottom half: It is well understood that humidity affects PTR sensitivity and there are well established methods for correcting the sensitivities of conventional PTR instruments. Were corrections for humidity not applied?*

Humidity effects are well known and corrections have been suggested. However, these effects are complex and depend on compound properties, energetics in the reactor, and the partial water pressure in the reactor. The latter two define the distribution of water clusters and may produce complex pathways for protonation. All three parameters control possible de-protonation pathways which are strongly dependent on humidity. All available corrections are empirical and depend on instrument and operating conditions. Therefore we did not apply any corrections, but we defined the operating conditions in which the humidity effects are relatively minor.

*Page 12 Line 29: probably because the primary ion distribution is shifted towards m/z 37, which is heavier than m/z 19 and therefore transmitted with higher efficiency*

The transmission is corrected for (red data in Figure 8). Moreover, the explanation suggested by the reviewer is ruled out by the fact that also the  $H_3O^+$  signal increases under humid conditions (yellow data in Fig 8).

*Figures 5-7: Why is PTR3 HAR not included in these figures?*

The reason is that the simple kinetic model does not describe the conditions in the PTR3. Therefore we excluded PTR3 from this discussion, but dedicated an appendix to the specialties of this instrument.

*Figure 6: Is the ratio of m37:19 corrected for transmission effects? If not, this is not a particularly useful point of comparison, because it reflects the downstream ion optics rather than the actual conditions present in the drift tube.*

Yes. We now specified this in the Figure caption.

*Figure 6: The sensitivity of some instruments, even after normalization, seems to be quite unstable from day-to-day. Can you comment on this?*

This reflects different operating conditions such as E/N, pressure, and temperature in the reactor.

Footnotes would be better placed in the main text as part of the methods explanation.

We prefer to keep the footnotes. They provide extra information while the flow of the main text remains focused.

*Eq. 10; note that this is only valid if reagent ions are negligibly depleted*

Thanks for pointing this out. We now specified this requirement.
